# Supplementary material
Source: PubMed Central journal article supplement (PMC10211471)
Supplement: NIHMS1717117-supplement-1.pdf [file NIHMS1717117-supplement-1.pdf]

|                        | <b>Malignant Lymph Nodes Detected</b>          |                                           |                                                                            |
|------------------------|------------------------------------------------|-------------------------------------------|----------------------------------------------------------------------------|
| <b>Disease Site</b>    | <b>Baseline <sup>18</sup>F-FDG PET/MRI (n)</b> | <b>Corresponding baseline CT scan (n)</b> | <b><sup>18</sup>F-FDG PET/MRI Lesions Detected on Corresponding CT (%)</b> |
| Neck/Supraclavicular   | 8                                              | 7                                         | 88                                                                         |
| Axial                  | 1                                              | 0                                         | 0                                                                          |
| Mediastinal/Thoracic   | 4                                              | 4                                         | 100                                                                        |
| Abdominal              | 1                                              | 0                                         | 0                                                                          |
| Retroperitoneal/Pelvic | 8                                              | 6                                         | 75                                                                         |
| Total                  | 22                                             | 17                                        | 77                                                                         |

Supplemental Table 1. Location and number of lymph nodes/lymph node disease detected with <sup>18</sup>F-FDG PET/MRI with CT concordance.
